# Supplementary material for: Interfacial charge transfer in sheet Ni2P–FePx heterojunction to promote the study of electrocatalytic oxygen evolution
Source: Royal Society of Chemistry journal article supplement (doi:10.1039/d4dt00054d), 2024-01-01
Supplement: d4dt00054d1.pdf [file d4dt00054d1.pdf]

## Electronic Supplementary Information

Qiangqiang Wang<sup>a</sup>, Xuejing Liu<sup>a</sup>, Xiang Ren<sup>a</sup>, Xu Sun<sup>a</sup>, Xuan Kuang<sup>a</sup>, Dan Wu<sup>a\*</sup>, Qin Wei<sup>a, b\*</sup>

<sup>a</sup> School of Chemistry and Chemical Engineering, University of Jinan, Jinan 250022, Shandong, China.

<sup>b</sup> Department of Chemistry, Sungkyunkwan University, Suwon, 16419, Republic of Korea.

\*Corresponding authors: Dan Wu, Qin Wei

E-mail: wudan791108@163.com (D.Wu); sdjndxwq@163.com (Q. Wei)

**Materials:** Nickel(II) nitrate hexahydrate ( $\text{Ni}(\text{NO}_3)_2 \cdot 6\text{H}_2\text{O}$ ), ferric(III) nitrate nonahydrate ( $\text{Fe}(\text{NO}_3)_3 \cdot 9\text{H}_2\text{O}$ ), urea ( $\text{CH}_4\text{N}_2\text{O}$ ), ammonium fluoride ( $\text{NH}_4\text{F}$ ), ethanol ( $\text{C}_2\text{H}_6\text{O}$ ), N, N-Dimethylformamide (DMF), potassium hydroxide (KOH) and sodium hypophosphite ( $\text{NaH}_2\text{PO}_2 \cdot \text{H}_2\text{O}$ ) were purchased from Jinan Camolai Trading Company. NF was purchased from Suzhou Taili New Energy Co., Ltd. Pt/C (20 wt% Pt on Vulcan XC-72R) were purchased from Jinan Jiadong Chemical Co., Ltd. The ultrapure water (UP  $\text{H}_2\text{O}$ ) was obtained using the AD3L-05-030OR UP  $\text{H}_2\text{O}$  instrument. All chemicals were analytically pure without further purification.

*TOF calculation:* The TOF is quantified the concentration of active site and calculated by the following equation:

$$TOF = \frac{jA}{4Fm}$$

Where  $j$  is current density ( $\text{A cm}^{-2}$ ) at defined overpotential;  $A$  is the geometric area of the testing electrode; 4 indicates the mole of electrons consumed for evolving one mole  $\text{O}_2$  from water;  $F$  is the Faradic constant ( $96485 \text{ C mol}^{-1}$ );  $m$  is the number of active sites (mol), which can be extracted from the linear relationship between the oxidation peak currents and scan rates by the following equation:

$$\text{slope} = \frac{n^2 F^2 m}{4RT}$$

Where  $n$  is the numbers of electron transferred;  $R$  and  $T$  are the ideal gas constant and the absolute temperature, respectively.

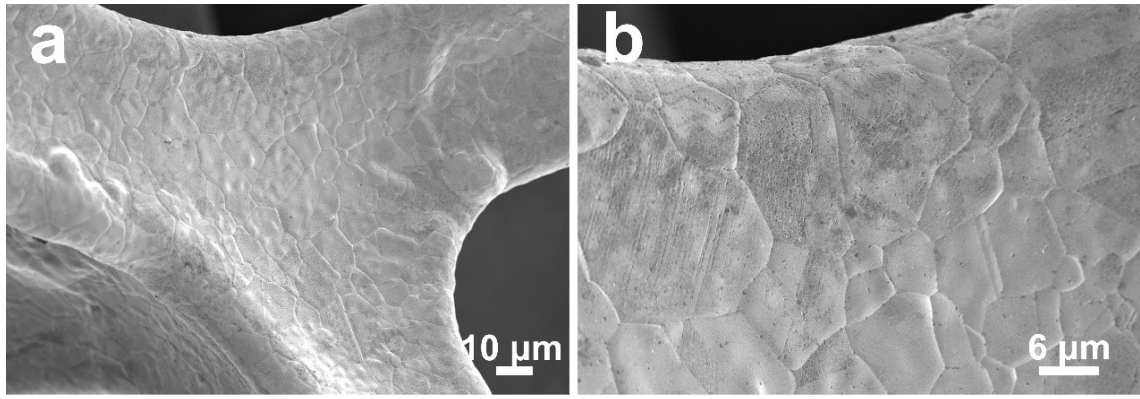

Fig. S1 SEM images of NF at different magnifications.

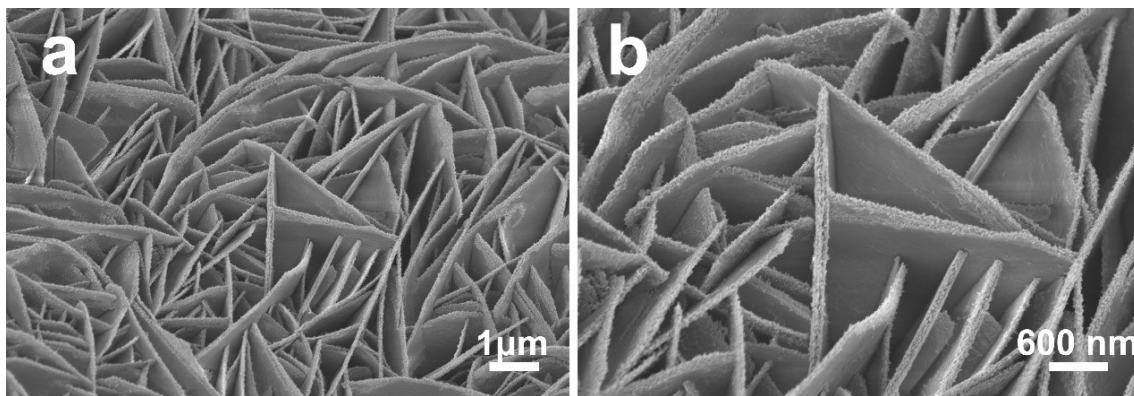

Fig. S2 SEM images of Ni(OH)F/NF at different magnifications.

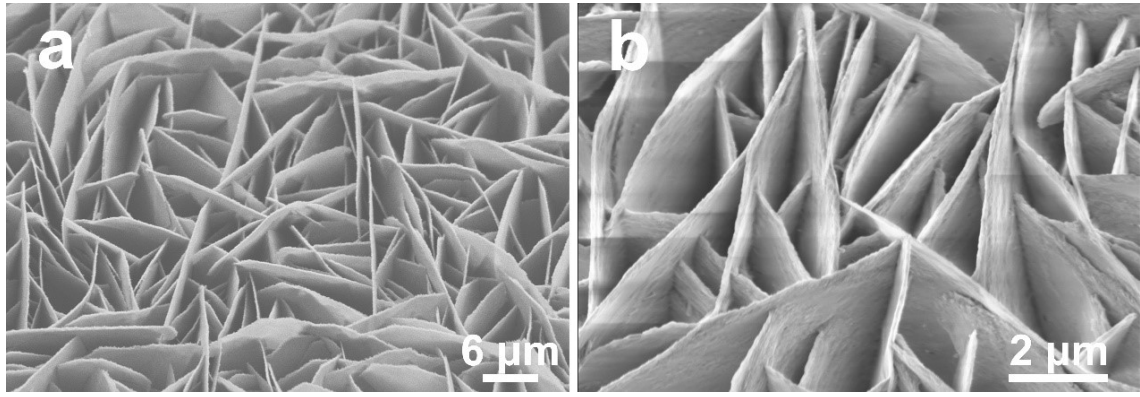

Fig. S3 SEM images of Ni<sub>2</sub>P/NF at different magnifications.

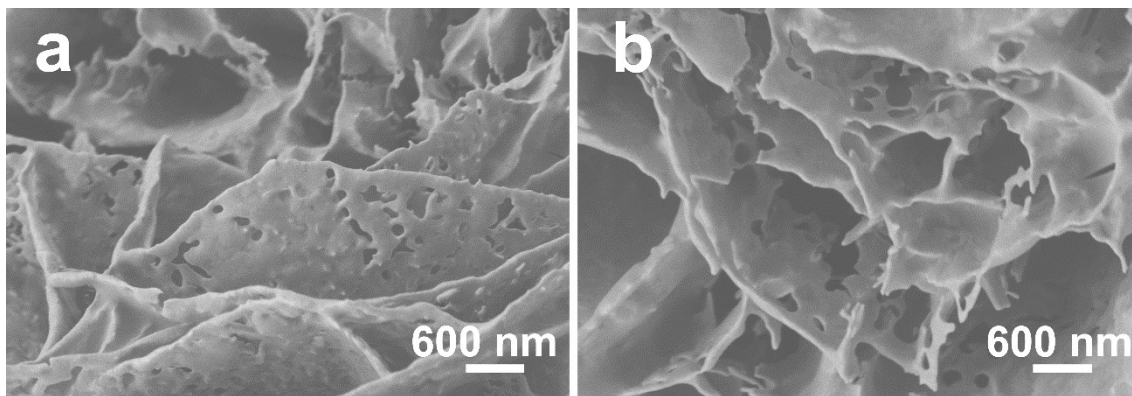

Fig. S4 SEM images of Ni(OH)F/NF treated in different concentrations of ink liquid (a)  $0.05 \text{ g mL}^{-1}$  (b)  $0.20 \text{ g mL}^{-1}$ .

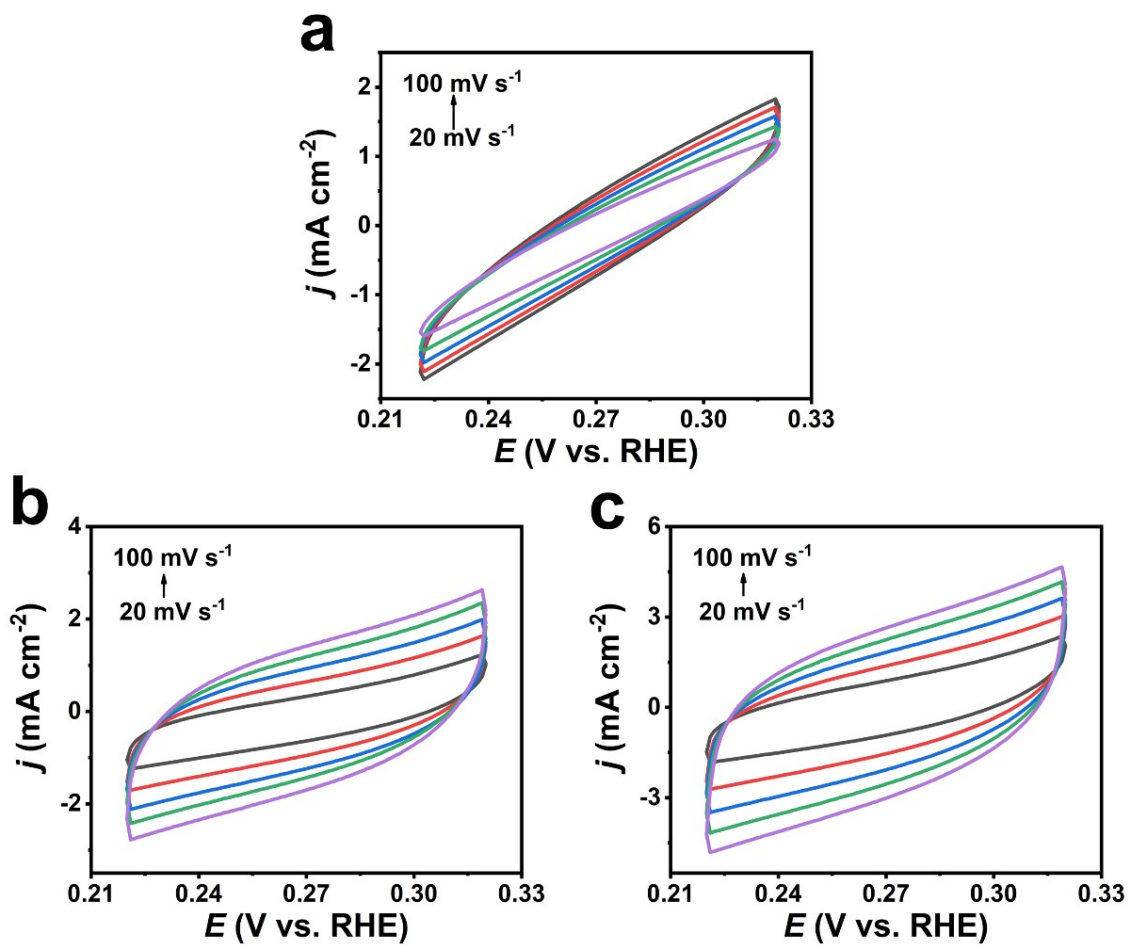

Fig. S5 CV curves of (a) NF, (b)  $\text{Ni}_2\text{P}/\text{NF}$  and (c)  $\text{Ni}_2\text{P}-\text{FeP}_x/\text{NF}$  at different scanning rates.

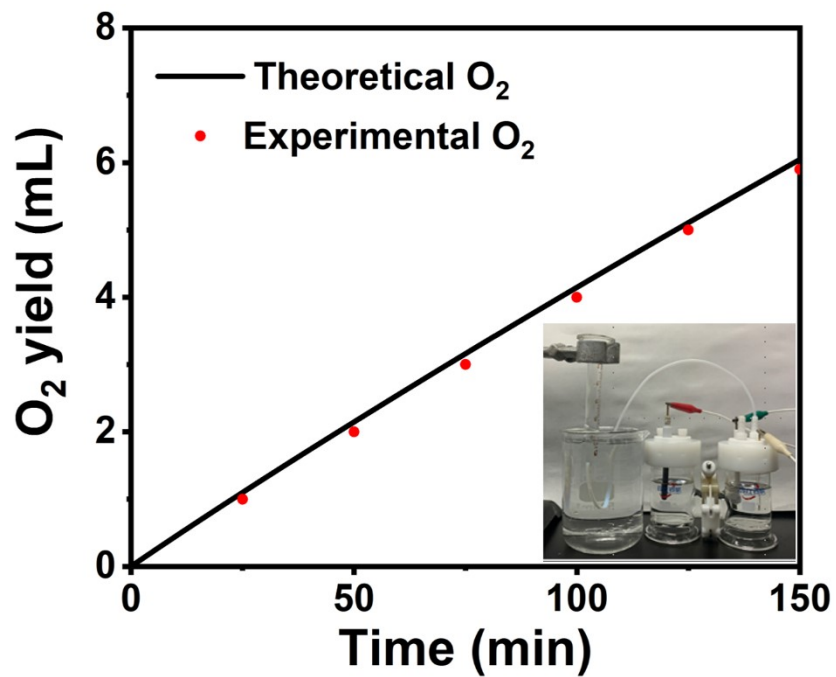

Fig. S6 Volume of oxygen theoretically calculated and actually collected (illustration: gas collection unit).



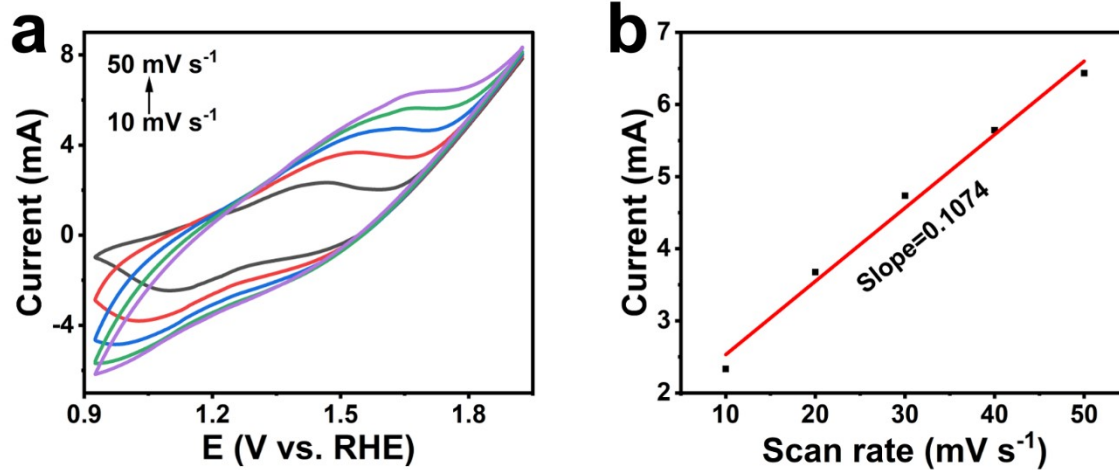

Fig. S7 (a) CVs for Ni<sub>2</sub>P-FeP<sub>x</sub>/NF under different scan rates from 10 to 50 mV s<sup>-1</sup> in 1.0 M KOH. (b) Linear relationship of the peak currents vs. scan rates.

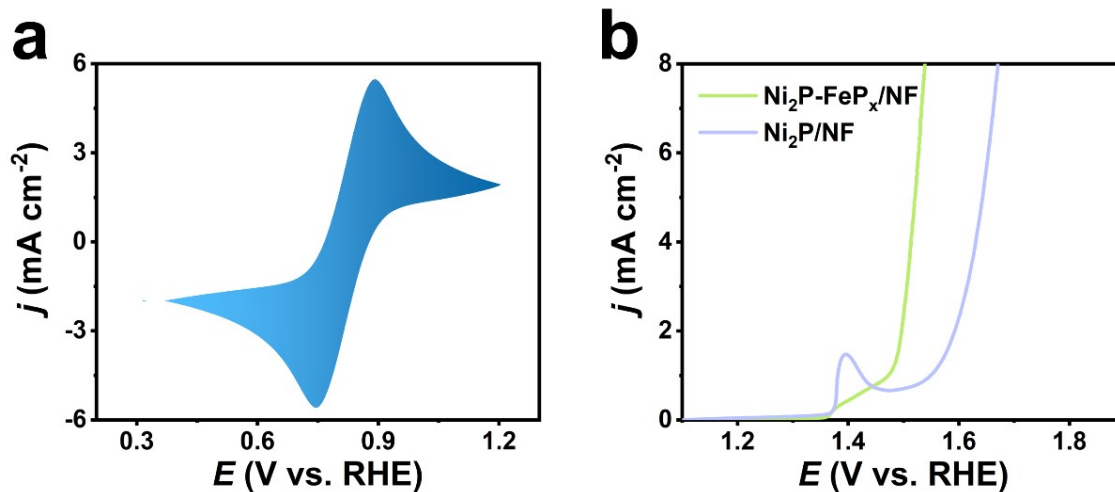

Fig. S8 (a) CV curve recorded by NF in potassium ferricyanide (5 mM) at a scanning rate of 50 mV s<sup>-1</sup>; (b) Electrochemical surface area normalization OER polarization curves.

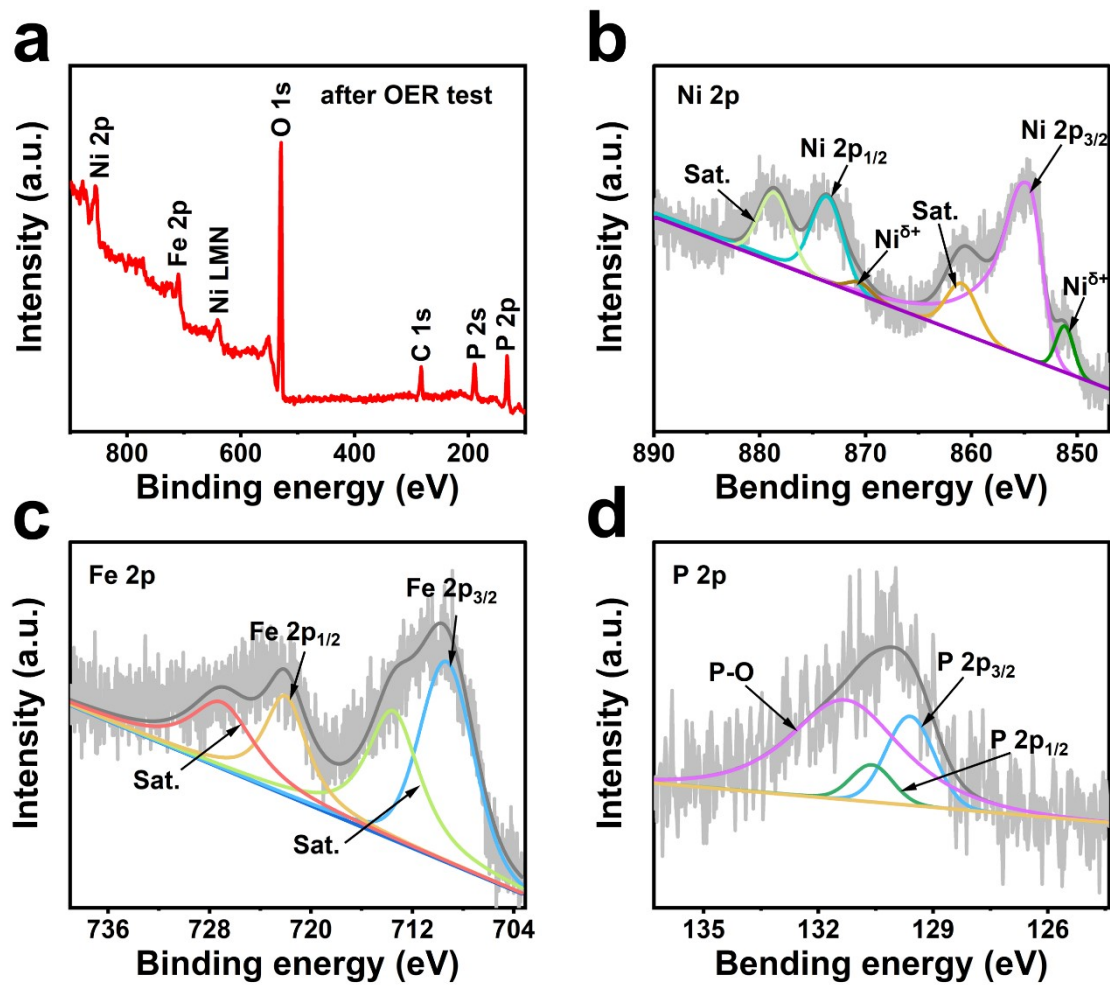

Fig. S9 (a) XPS survey spectrum of Ni<sub>2</sub>P-FeP<sub>x</sub>/NF after OER test; High-resolution XPS spectra of (b) Ni 2p, (c) Fe 2p and (d) P 2p in Ni<sub>2</sub>P-FeP<sub>x</sub>/NF after OER test.

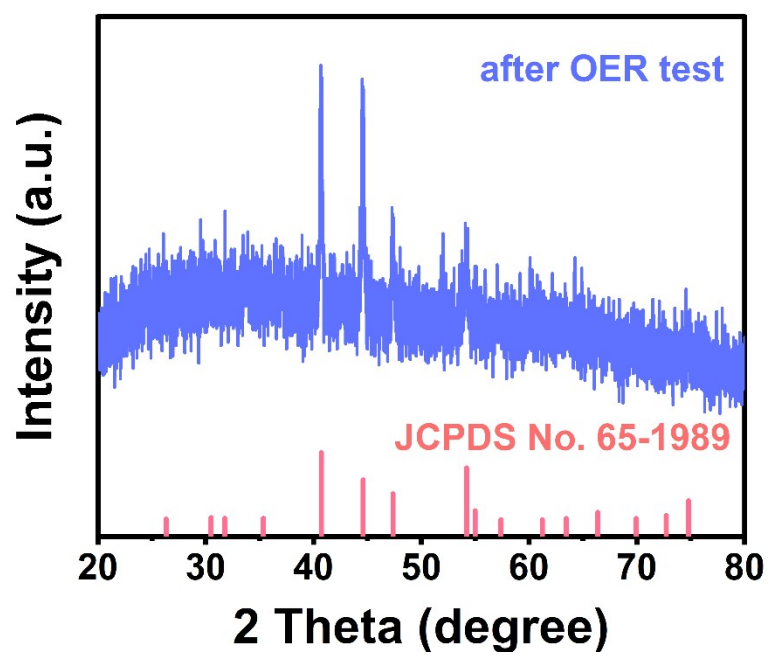

Fig. S10 XRD image of  $\text{Ni}_2\text{P-FeP}_x$  after OER test.

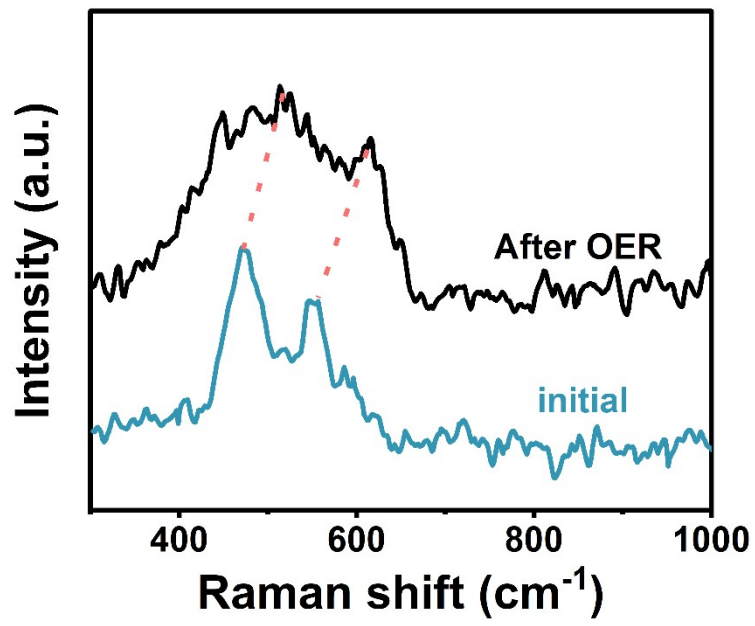

Fig. S11 Raman spectra for Ni<sub>2</sub>P-FeP<sub>x</sub> prior to and after OER test.

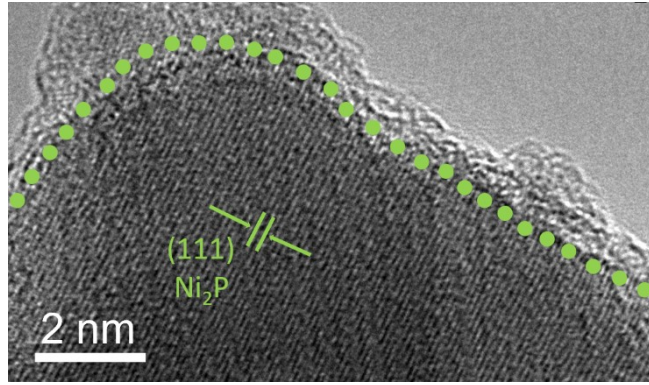

Fig. S12 HRTEM image of Ni<sub>2</sub>P-FeP<sub>x</sub> after OER test.

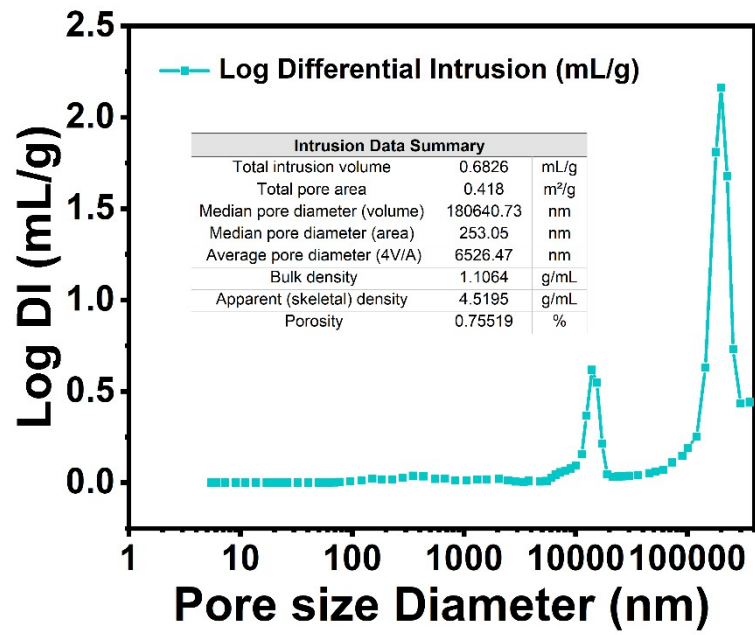

Fig. S13 Mercury injection curve of Ni<sub>2</sub>P-FeP<sub>x</sub>/NF.

Table S1 Comparison of OER performance of Ni<sub>2</sub>P-FeP<sub>x</sub>/NF and other catalysts in 1.0 M KOH

| Catalyst                             | Electrolyte | <i>j</i> (mA cm <sup>-2</sup> ) | TOF(s <sup>-1</sup> ) | <i>η</i> (mV) | Ref.      |
|--------------------------------------|-------------|---------------------------------|-----------------------|---------------|-----------|
| Ni <sub>2</sub> P-FeP <sub>x</sub>   | 1.0 M KOH   | 50                              | 0.458                 | 241           | This work |
| V-Ni <sub>2</sub> P                  | 1.0 M KOH   | 10                              | 1.85                  | 250           | 1         |
| FeNi <sub>2</sub> P                  | 1.0 M KOH   | 10                              | /                     | 210           | 2         |
| Ni <sub>2</sub> P                    | 1.0 M KOH   | 10                              | /                     | 290           | 3         |
| Ni <sub>1-x</sub> Fe <sub>x</sub> PS | 1.0 M KOH   | 100                             | 0.097                 | 300           | 4         |
| Ni <sub>2</sub> P-Fe <sub>2</sub> P  | 1.0 M KOH   | 100                             | 0.925                 | 315           | 5         |
| NiPS <sub>3</sub>                    | 1.0 M KOH   | 10                              | 0.0294                | 343           | 6         |



1. W.-Z. Zhang, G.-Y. Chen, J. Zhao, J.-C. Liang, L.-F. Sun, G.-F. Liu, B.-W. Ji, X.-Y. Yan and J.-R. Zhang, *Journal of Colloid and Interface Science*, 2020, **561**, 638-646.
2. S. Lin, Y. Yu, D. Sun, F. Meng, W. Chu, L. Huang, J. Ren, Q. Su, S. Ma and B. Xu, *Journal of Colloid and Interface Science*, 2022, **608**, 2192-2202.
3. L.-A. Stern, L. Feng, F. Song and X. Hu, *Energy & Environmental Science*, 2015, **8**, 2347-2351.
4. W. Peng, J. Li, K. Shen, L. Zheng, H. Tang, Y. Gong, J. Zhou, N. Chen, S. Zhao, M. Chen, F. Gao and H. Gou, *Journal of Materials Chemistry A*, 2020, **8**, 23580-23589.
5. L. Wu, L. Yu, F. Zhang, B. McElhenny, D. Luo, A. Karim, S. Chen and Z. Ren, *Advanced Functional Materials*, 2020, **31**, 2006484.
6. S. Xue, L. Chen, Z. Liu, H.-M. Cheng and W. Ren, *ACS Nano*, 2018, **12**, 5297-5305.
